# Supplementary material for: The Role of Basic Psychological Needs in the Adoption of Healthy Habits by Adolescents
Source: MDPI journal article supplement (doi:10.3390/bs13070592), 2023-07-14
Supplement: s1 [file s1]

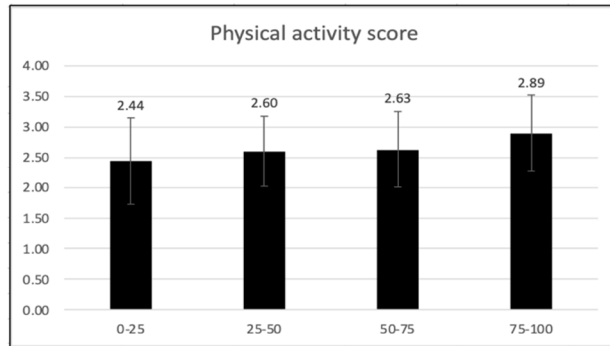

0-25 vs 25-50: Mean Diff: -0.155; p=0.154; 95% CI: -0.34; 0.03  
 0-25 vs 50-75: Mean Diff: -0.189; p=0.026; 95% CI: -0.36; -0.01  
 0-25 vs 75-100: Mean Diff: -0.445; p<0.001; 95% CI: -0.62; -0.27  
 25-50 vs 50-75: Mean Diff: -0.034; p=1.000; 95% CI: -0.21; 0.14  
 25-50 vs 75-100: Mean Diff: -0.289; p<0.001; 95% CI: -0.46; -0.11  
 50-75 vs 75-100: Mean Diff: -0.255; p<0.001; 95% CI: -0.42; -0.09

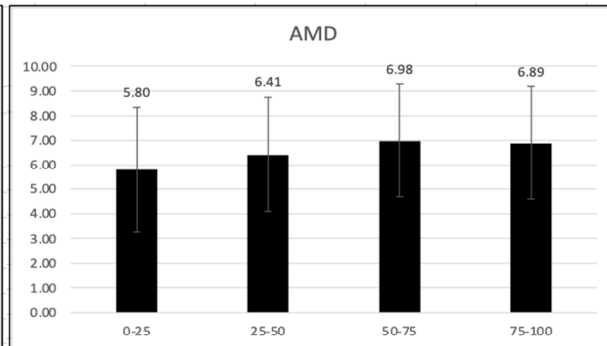

0-25 vs 25-50: Mean Diff: -0.62; p=0.104; 95% CI: -1.30; 0.07  
 0-25 vs 50-75: Mean Diff: -1.18; p<0.001; 95% CI: -1.83; -0.53  
 0-25 vs 75-100: Mean Diff: -1.09; p<0.001; 95% CI: -1.74; -0.44  
 25-50 vs 50-75: Mean Diff: -0.56; p=0.135; 95% CI: -1.21; 0.09  
 25-50 vs 75-100: Mean Diff: -0.48; p=0.321; 95% CI: -1.13; 0.17  
 50-75 vs 75-100: Mean Diff: 0.09; p=1.000; 95% CI: -0.53; 0.70

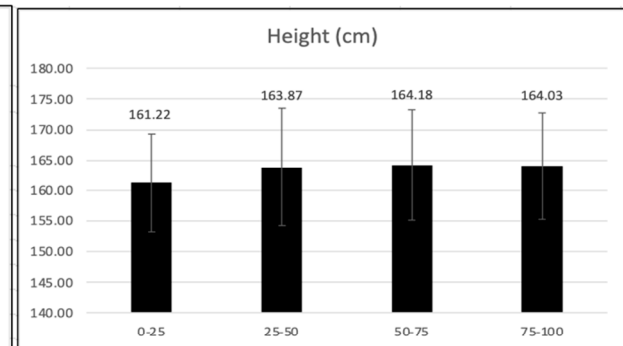

0-25 vs 25-50: Mean Diff: -2.651; p=0.040; 95% CI: -5.23; -0.07  
 0-25 vs 50-75: Mean Diff: -2.965; p=0.009; 95% CI: -5.42; -0.51  
 0-25 vs 75-100: Mean Diff: -2.816; p=0.015; 95% CI: -5.27; -0.36  
 25-50 vs 50-75: Mean Diff: -0.315; p=1.000; 95% CI: -2.77; 2.14  
 25-50 vs 75-100: Mean Diff: -0.166; p=1.000; 95% CI: -2.62; 2.29  
 50-75 vs 75-100: Mean Diff: 0.149; p=1.000; 95% CI: -2.17; 2.47

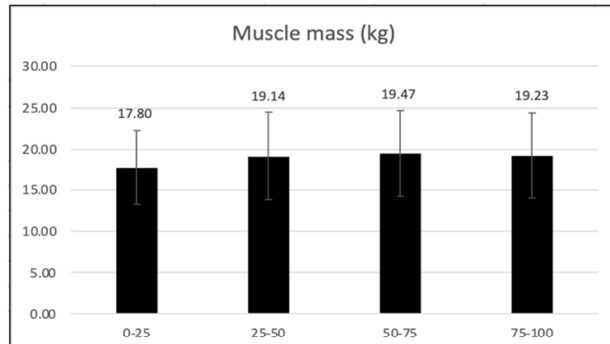

0-25 vs 25-50: Mean Diff: -1.345; p=0.095; 95% CI: -2.82; 0.13  
 0-25 vs 50-75: Mean Diff: -1.675; p=0.010; 95% CI: -3.08; -0.27  
 0-25 vs 75-100: Mean Diff: -1.434; p=0.041; 95% CI: -2.83; -0.04  
 25-50 vs 50-75: Mean Diff: -0.330; p=1.000; 95% CI: -1.73; 1.07  
 25-50 vs 75-100: Mean Diff: -0.088; p=1.000; 95% CI: -1.49; 1.31  
 50-75 vs 75-100: Mean Diff: 0.241; p=1.000; 95% CI: -1.08; 1.56

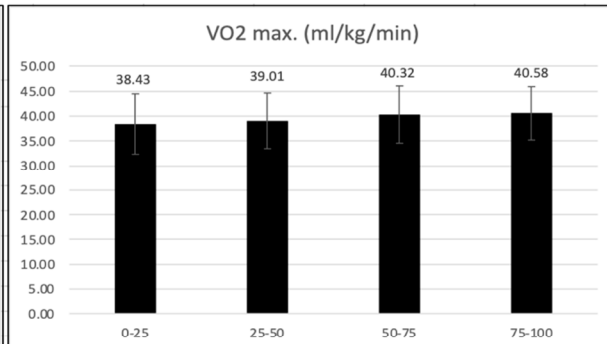

0-25 vs 25-50: Mean Diff: -0.578; p=1.000; 95% CI: -2.22; 1.06  
 0-25 vs 50-75: Mean Diff: -1.890; p=0.008; 95% CI: -3.45; -0.33  
 0-25 vs 75-100: Mean Diff: -2.148; p=0.002; 95% CI: -3.71; -0.59  
 25-50 vs 50-75: Mean Diff: -1.311; p=0.159; 95% CI: -2.87; 0.25  
 25-50 vs 75-100: Mean Diff: -1.569; p=0.047; 95% CI: -3.13; -0.01  
 50-75 vs 75-100: Mean Diff: -0.258; p=1.000; 95% CI: -1.73; 1.22

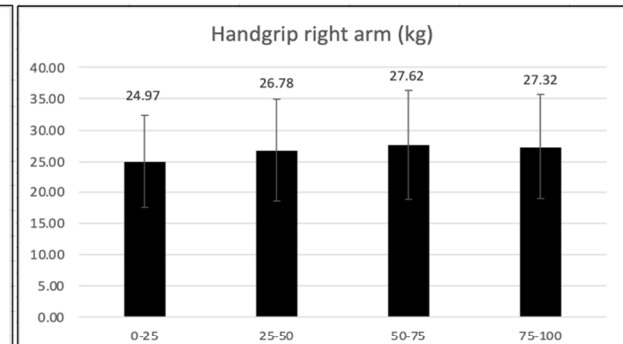

0-25 vs 25-50: Mean Diff: -1.803; p=0.278; 95% CI: -4.19; 0.59  
 0-25 vs 50-75: Mean Diff: -2.644; p=0.013; 95% CI: -4.92; -0.37  
 0-25 vs 75-100: Mean Diff: -2.342; p=0.039; 95% CI: -4.61; -0.07  
 25-50 vs 50-75: Mean Diff: -0.841; p=1.000; 95% CI: -3.11; 1.43  
 25-50 vs 75-100: Mean Diff: -0.538; p=1.000; 95% CI: -2.81; 1.73  
 50-75 vs 75-100: Mean Diff: 0.303; p=1.000; 95% CI: -1.85; 2.45

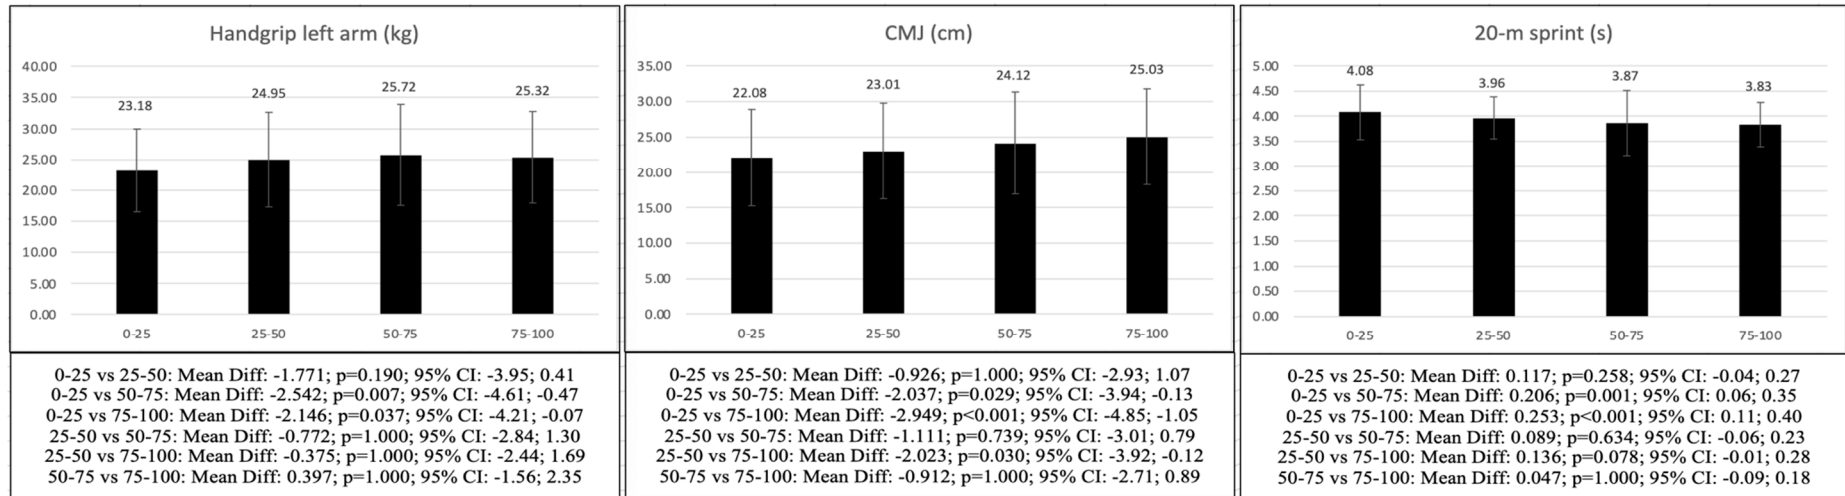

Figure S3. Bonferroni post-hoc analysis of the variables that showed significant differences in relatedness.
