# Supplementary material for: The Role of Basic Psychological Needs in the Adoption of Healthy Habits by Adolescents
Source: MDPI journal article supplement (doi:10.3390/bs13070592), 2023-07-14
Supplement: s1 [file s1]

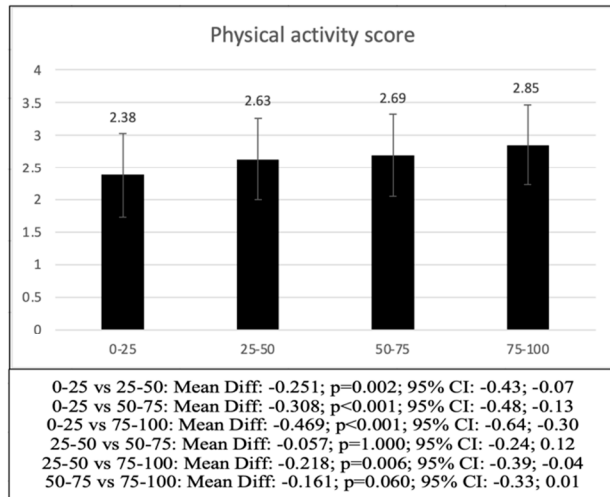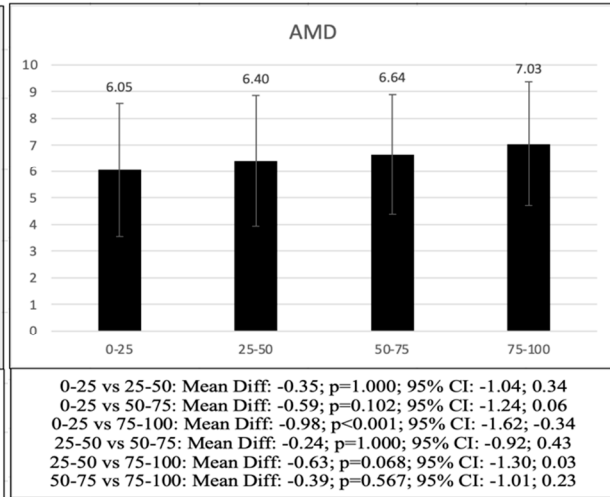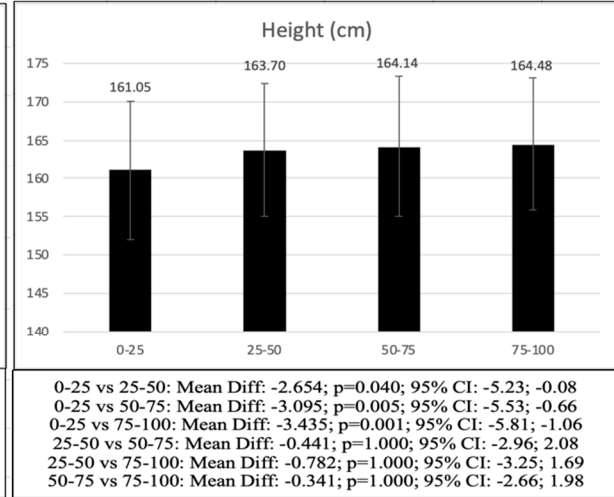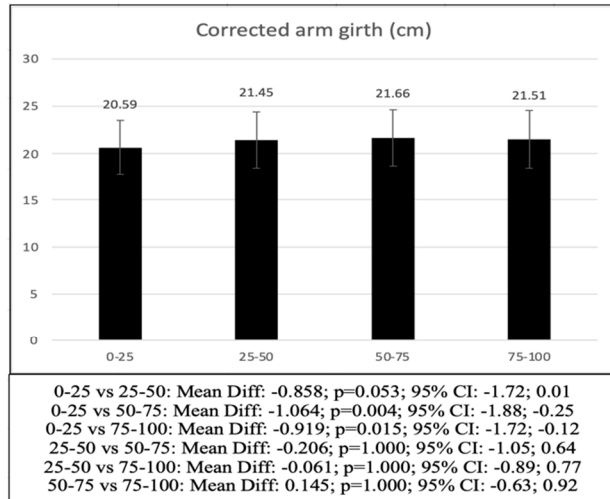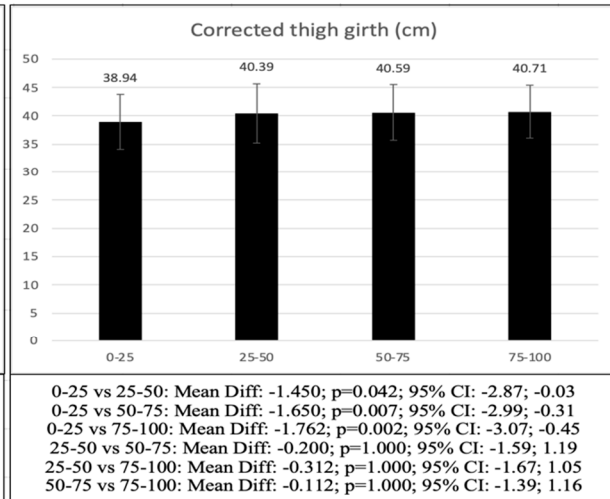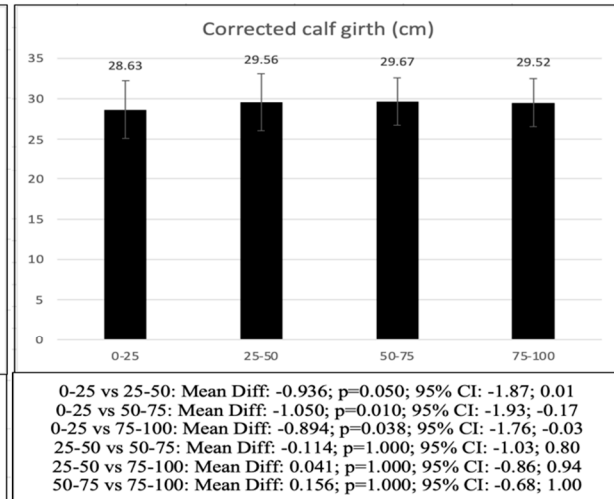

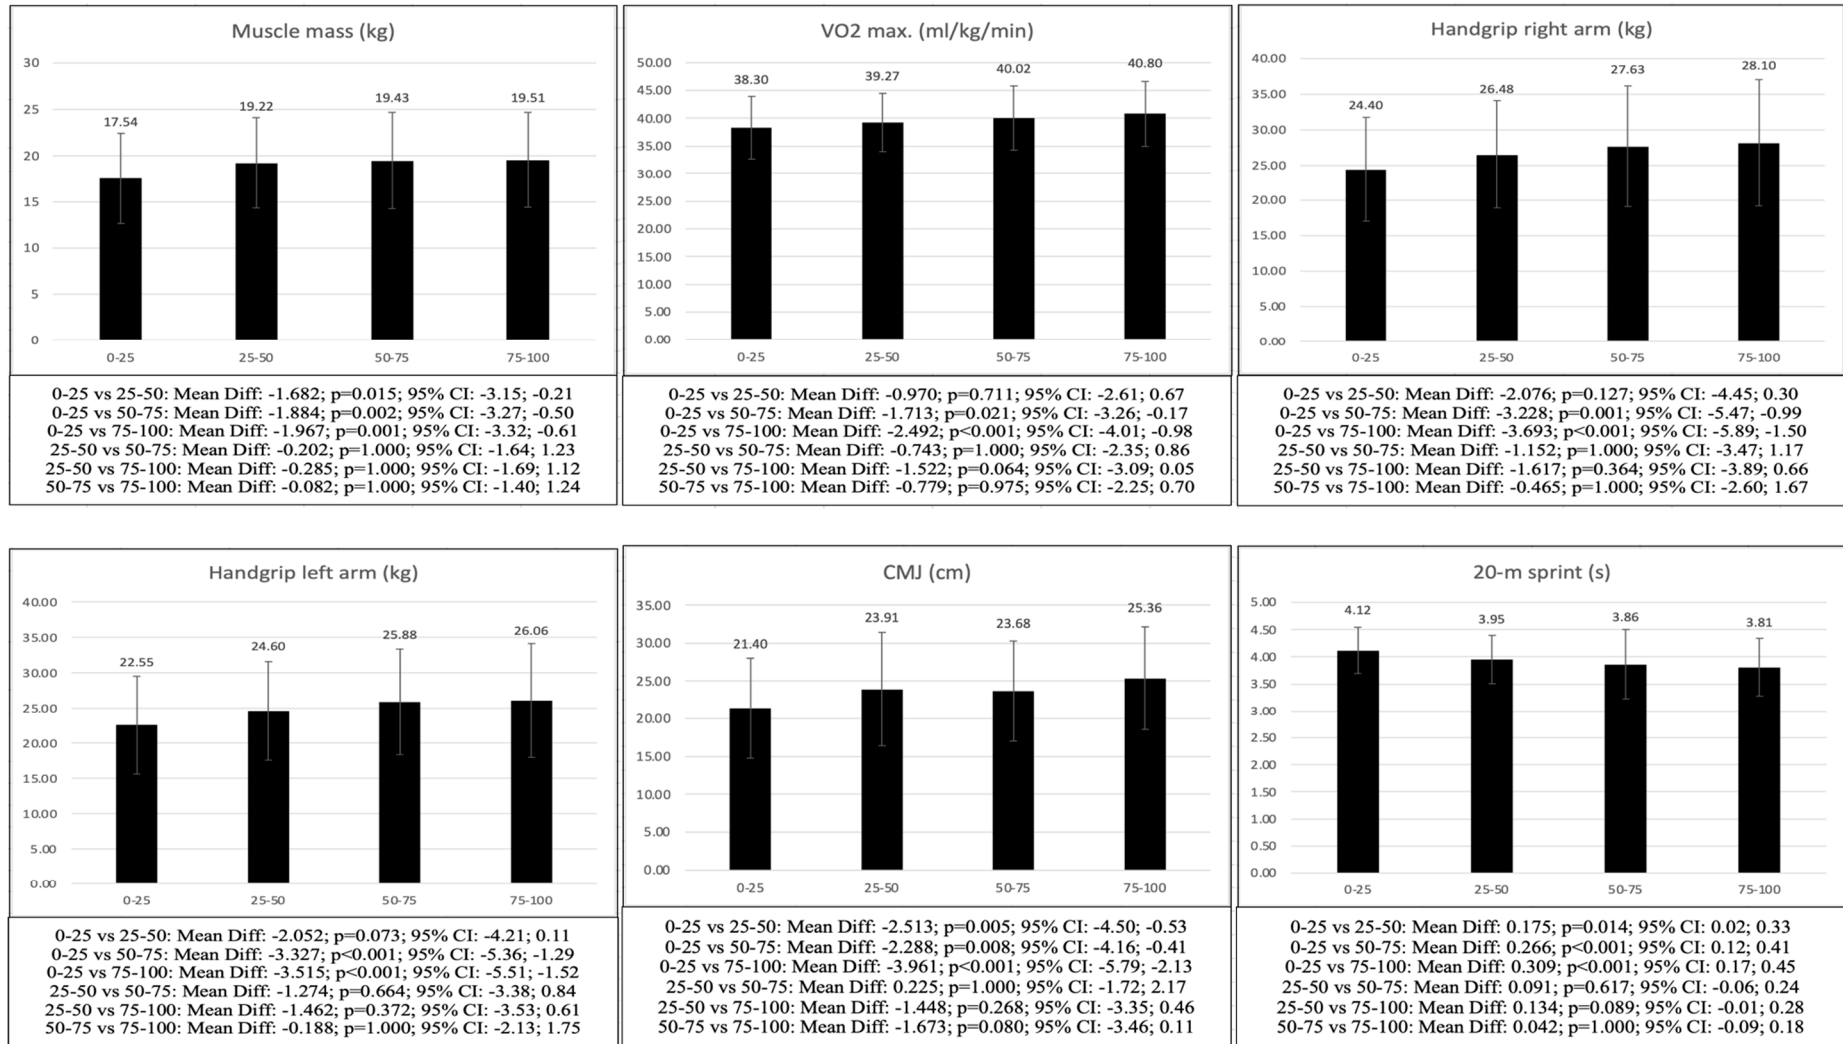

Figure S2. Bonferroni post-hoc analysis of the variables that showed significant differences in autonomy.
